# Supplementary material for: Facile sonochemical synthesis of carbon nanotube-supported bimetallic Pt–Rh nanoparticles for room temperature hydrogenation of arenes
Source: Royal Society of Chemistry journal article supplement (doi:10.1039/c1nj20028c), 2011-01-01
Supplement: c1nj20028c.pdf [file c1nj20028c.pdf]

## **Supplementary Information**

# **Facile Sonochemical Synthesis of Carbon Nanotube-Supported Bimetallic Pt-Rh Nanoparticles for Room Temperature Hydrogenation of Arenes**

Horng-Bin Pan, Chien M. Wai\*

*Department of Chemistry, University of Idaho, Moscow, Idaho, 83844-2343*

Telephone: 208-885-6552; Fax: 208-885-6173

E-mail: [cwai@uidaho.edu](mailto:cwai@uidaho.edu)

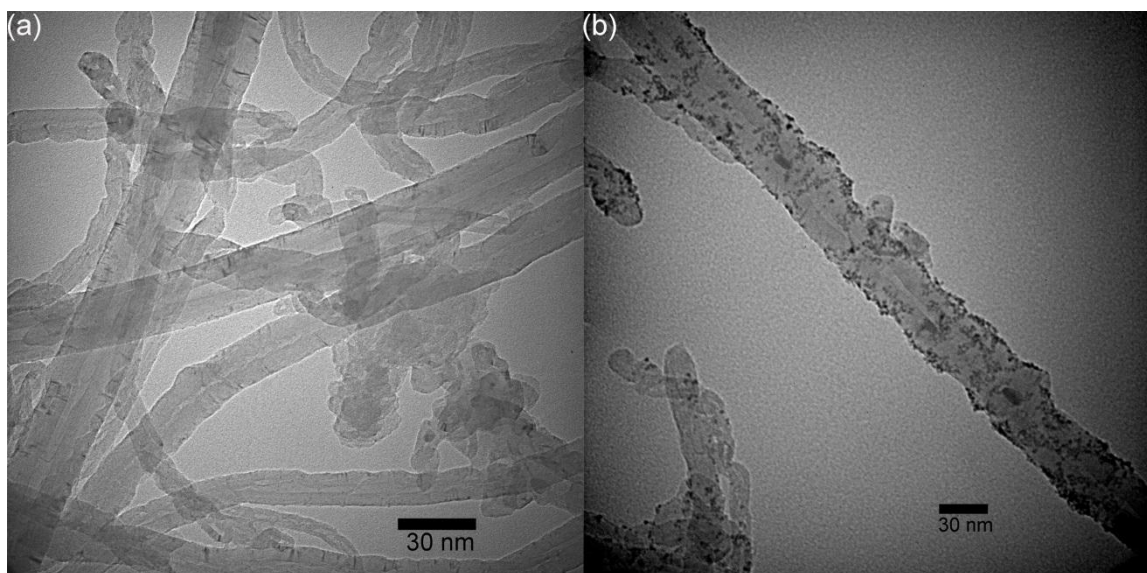

**Fig. 1S** (a) The TEM image of as-received MWNTs. (b) the low magnifying TEM image of Pt/MWNTs.

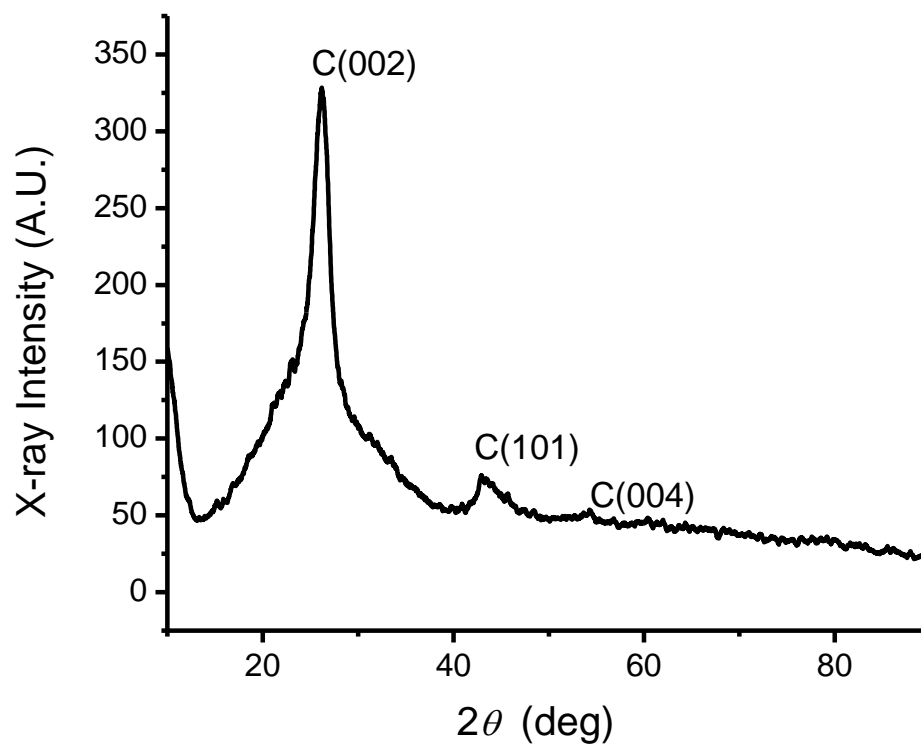

**g. 2S** XRD patterns of carboxylic acid functionalized multi-walled carbon nanotubes.

**Fi**

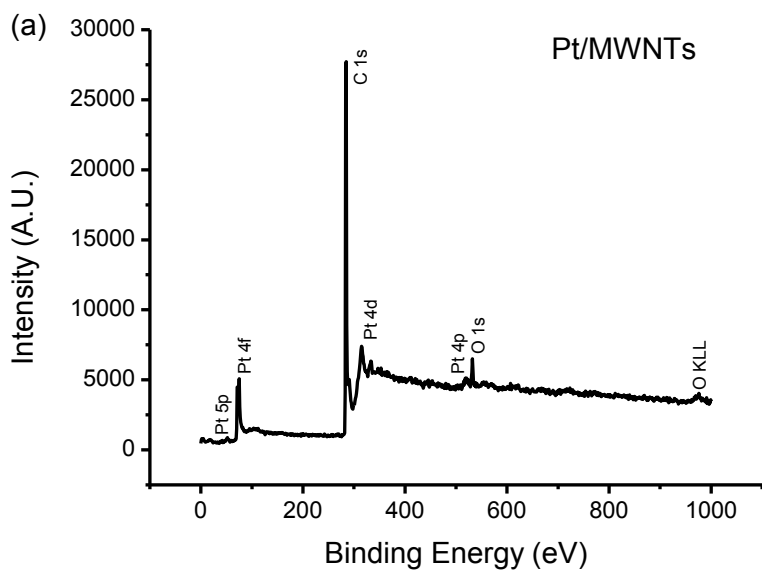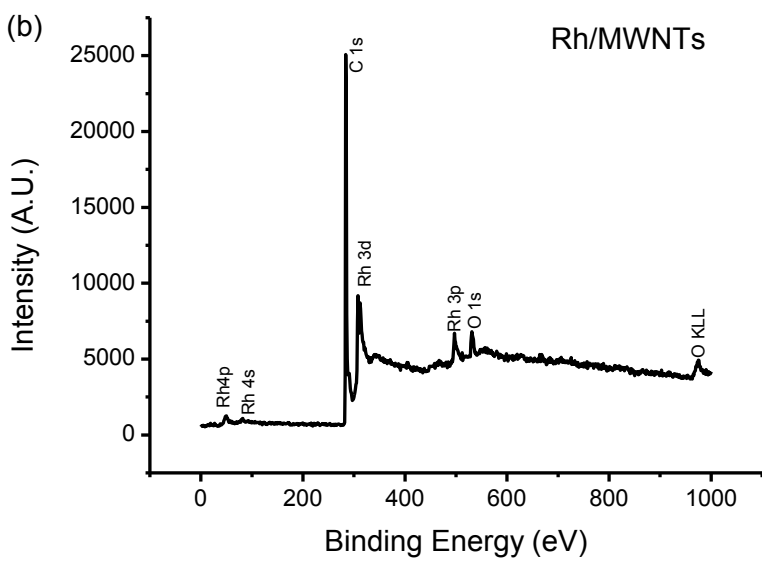

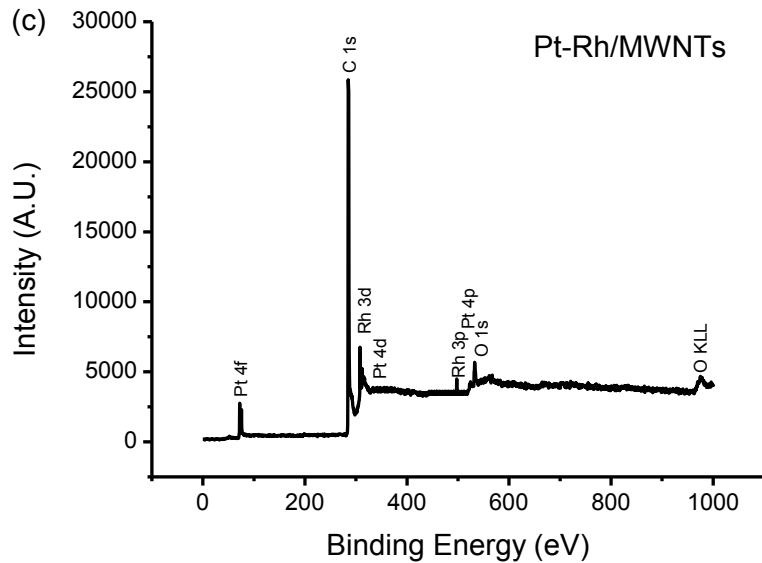

**Fig. 3S** The survey scan XPS spectra of different CNT-supported metallic nanoparticles: (a) Pt/MWNTs, (b) Rh/MWNTs, and (c) Pt-Rh/MWNTs

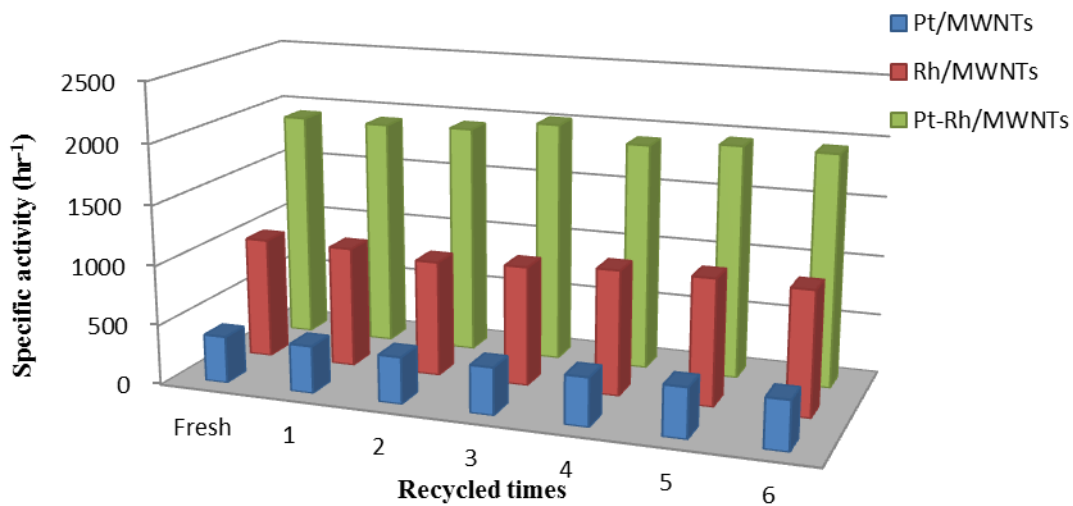

**Fig. 4S** Activity of recycled different CNT-supported metallic nanoparticle catalysts for hydrogenation of neat toluene.

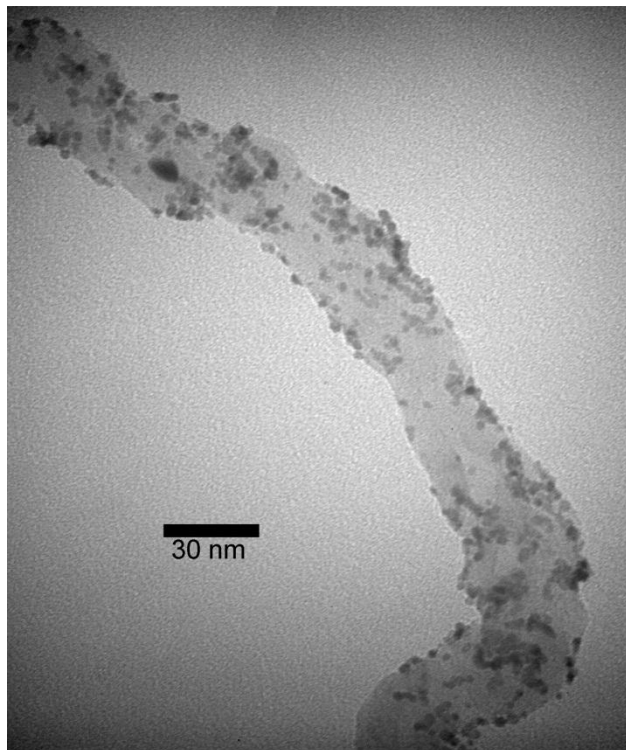

**Fig. 5S** TEM image of CNT-supported bimetallic Pt-Rh nanocatalysts after 6 times of repeated use.
